# Supplementary material for: Significance of uncertain phasing between the onsets of stadial–interstadial transitions in different Greenland ice core proxies
Source: Copernicus journal article supplement (doi:10.5194/cp-17-1751-2021), 2021-08-26
Supplement: Supplementary file 1 [file cp-17-1751-2021-supplement.zip]

Archive with 2 entries (2 files):
- cp-17-1751-2021-supplement-title-page.pdf
- table_B1.csv
