# Supplementary material for: Significance of uncertain phasing between the onsets of stadial–interstadial transitions in different Greenland ice core proxies
Source: Copernicus journal article supplement (doi:10.5194/cp-17-1751-2021), 2021-08-26
Supplement: Supplementary file 1 [file cp-17-1751-2021-supplement.zip › cp-17-1751-2021-supplement-title-page.pdf]

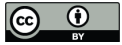

## *Supplement of*

# **Significance of uncertain phasing between the onsets of stadial–interstadial transitions in different Greenland ice core proxies**

**Keno Riechers and Niklas Boers**

*Correspondence to:* Keno Riechers ([riechers@pik-potsdam.de](mailto:riechers@pik-potsdam.de))

- [cp-17-1751-2021-supplement-title-page.pdf](#)
- [table\\_B1.csv](#)

The copyright of individual parts of the supplement might differ from the article licence.
