# Supplementary material for: Significance of uncertain phasing between the onsets of stadial–interstadial transitions in different Greenland ice core proxies
Source: Copernicus journal article supplement (doi:10.5194/cp-17-1751-2021), 2021-08-26
Supplement: Supplementary file 1 [file cp-17-1751-2021-supplement.zip › table_B1.csv]

		expected p-value	expected p-value	expected p-value	share of significant p-values	share of significant p-values	share of significant p-values	p-value of expected sample	p-value of expected sample	p-value of expected sample
		t-test	WSR-test	bootstrap-test	t-test	WSR-test	bootstrap-test	t-test	WSR-test	bootstrap-test
NGRIP:Ca-Na	0	0.219	0.168	0.217	0.258	0.324	0.299	0.044	0.009	0.02
NGRIP:Ca-Na	1	0.218	0.166	0.215	0.246	0.316	0.292	0.044	0.009	0.019
NGRIP:Ca-Na	2	0.219	0.165	0.216	0.258	0.324	0.294	0.044	0.009	0.018
NGRIP:Ca-Na	3	0.22	0.166	0.217	0.254	0.322	0.295	0.044	0.009	0.02
NGRIP:Ca-Na	4	0.219	0.166	0.217	0.255	0.32	0.296	0.044	0.009	0.02
NGRIP:Ca-Na	5	0.218	0.166	0.216	0.254	0.319	0.293	0.044	0.009	0.019
NGRIP:Ca-Na	6	0.219	0.167	0.217	0.255	0.319	0.299	0.044	0.009	0.021
NGRIP:Ca-Na	7	0.219	0.167	0.217	0.252	0.319	0.295	0.044	0.009	0.019
NGRIP:Ca-Na	8	0.219	0.164	0.217	0.257	0.316	0.3	0.044	0.009	0.02
NGRIP:Ca-Na	9	0.218	0.165	0.216	0.261	0.32	0.302	0.044	0.009	0.02
NGRIP:lt-Na	0	0.093	0.091	0.086	0.469	0.484	0.524	0.023	0.017	0.017
NGRIP:lt-Na	1	0.092	0.091	0.085	0.467	0.482	0.516	0.023	0.017	0.014
NGRIP:lt-Na	2	0.093	0.092	0.086	0.462	0.489	0.519	0.023	0.017	0.015
NGRIP:lt-Na	3	0.092	0.09	0.085	0.465	0.482	0.516	0.023	0.017	0.016
NGRIP:lt-Na	4	0.093	0.09	0.086	0.471	0.488	0.529	0.023	0.017	0.014
NGRIP:lt-Na	5	0.093	0.092	0.086	0.468	0.492	0.522	0.023	0.017	0.015
NGRIP:lt-Na	6	0.092	0.089	0.085	0.47	0.488	0.521	0.023	0.017	0.013
NGRIP:lt-Na	7	0.092	0.091	0.085	0.461	0.486	0.515	0.023	0.017	0.016
NGRIP:lt-Na	8	0.093	0.091	0.086	0.477	0.486	0.525	0.023	0.017	0.015
NGRIP:lt-Na	9	0.093	0.091	0.086	0.475	0.488	0.524	0.023	0.017	0.015
NGRIP:Ca-d18O	0	0.234	0.182	0.233	0.235	0.306	0.262	0.042	0.015	0.037
NGRIP:Ca-d18O	1	0.234	0.182	0.232	0.231	0.294	0.257	0.042	0.015	0.035
NGRIP:Ca-d18O	2	0.234	0.18	0.232	0.226	0.3	0.254	0.042	0.015	0.039
NGRIP:Ca-d18O	3	0.234	0.182	0.233	0.236	0.314	0.261	0.042	0.015	0.036
NGRIP:Ca-d18O	4	0.234	0.181	0.232	0.234	0.308	0.261	0.042	0.015	0.031
NGRIP:Ca-d18O	5	0.233	0.181	0.231	0.23	0.304	0.253	0.042	0.015	0.032
NGRIP:Ca-d18O	6	0.234	0.181	0.232	0.228	0.306	0.253	0.042	0.015	0.037
NGRIP:Ca-d18O	7	0.234	0.18	0.232	0.235	0.31	0.261	0.042	0.015	0.033
NGRIP:Ca-d18O	8	0.234	0.183	0.232	0.236	0.313	0.263	0.042	0.015	0.034
NGRIP:Ca-d18O	9	0.234	0.182	0.232	0.231	0.307	0.257	0.042	0.015	0.035
NGRIP:lt-d18O	0	0.133	0.11	0.129	0.369	0.436	0.414	0.024	0.009	0.017
NGRIP:lt-d18O	1	0.134	0.111	0.129	0.37	0.441	0.416	0.024	0.009	0.016
NGRIP:lt-d18O	2	0.133	0.11	0.127	0.379	0.44	0.422	0.024	0.009	0.017
NGRIP:lt-d18O	3	0.135	0.112	0.13	0.38	0.435	0.42	0.024	0.009	0.017
NGRIP:lt-d18O	4	0.134	0.111	0.129	0.378	0.442	0.419	0.024	0.009	0.018
NGRIP:lt-d18O	5	0.133	0.109	0.128	0.373	0.437	0.416	0.024	0.009	0.018
NGRIP:lt-d18O	6	0.133	0.111	0.128	0.384	0.446	0.426	0.024	0.009	0.017
NGRIP:lt-d18O	7	0.133	0.109	0.128	0.376	0.445	0.416	0.024	0.009	0.017
NGRIP:lt-d18O	8	0.134	0.11	0.129	0.381	0.443	0.424	0.024	0.009	0.018
NGRIP:lt-d18O	9	0.134	0.11	0.129	0.376	0.441	0.418	0.024	0.009	0.019
NEEM:Ca-Na	0	0.08	0.076	0.074	0.566	0.584	0.61	0.008	0.007	0.006
NEEM:Ca-Na	1	0.08	0.076	0.074	0.57	0.581	0.61	0.008	0.007	0.006
NEEM:Ca-Na	2	0.079	0.075	0.073	0.571	0.587	0.614	0.008	0.007	0.005
NEEM:Ca-Na	3	0.079	0.076	0.073	0.573	0.586	0.615	0.008	0.007	0.006
NEEM:Ca-Na	4	0.08	0.077	0.074	0.572	0.584	0.612	0.008	0.007	0.005
NEEM:Ca-Na	5	0.08	0.076	0.074	0.571	0.579	0.608	0.008	0.007	0.005
NEEM:Ca-Na	6	0.08	0.077	0.074	0.565	0.577	0.609	0.008	0.007	0.006
NEEM:Ca-Na	7	0.08	0.077	0.074	0.57	0.583	0.612	0.008	0.007	0.006
NEEM:Ca-Na	8	0.079	0.075	0.073	0.57	0.58	0.614	0.008	0.007	0.006
NEEM:Ca-Na	9	0.078	0.075	0.072	0.567	0.576	0.608	0.008	0.007	0.006
